# Supplementary material for: NGT1 Is Essential for N-Acetylglucosamine-Mediated Filamentous Growth Inhibition and HXK1 Functions as a Positive Regulator of Filamentous Growth in Candida tropicalis
Source: PubMed Central journal article supplement (PMC7312872; doi:10.3390/ijms21114036), 2020-06-05
Supplement: ijms-21-04036-s001.pdf [file ijms-21-04036-s001.pdf]

## Supplementary Data

# ***NGT1* is Essential for *N*-acetylglucosamine-mediated Filamentous Growth Inhibition and *HXK1* Functions as a Positive Regulator of Filamentous Growth in *Candida tropicalis***

Qiuyu Zhang, Li Xu, Sheng Yuan, Qinghua Zhou, Xuxia Wang, Lei Wang, Zhiming Hu,  
Yunjun Yan\*

Key Laboratory of Molecular Biophysics, the Ministry of Education; College of Life Science and  
Technology, Huazhong University of Science and Technology, Wuhan 430074, P. R. China;  
qiuyuzhang2008@163.com (Q.Z.); xuli@mail.hust.edu.cn (L.X.); m201871755@hust.edu.cn (S.Y.);  
qinghuazhou1@126.com (Q.Z.); 2017506005@hust.edu.cn (X.W.); jiali20042005@126.com (L.W.);  
zhiming711@163.com (Z.H.)

\* Correspondence: yanyunjun@hust.edu.cn; Tel.: +86-27-87792213

**Table S1** Primers used in this study.

| <b>name</b>     | <b>Sequence (5' to 3')</b>                      | <b>Purpose</b>                |
|-----------------|-------------------------------------------------|-------------------------------|
| NGT1-fwd        | AGTTAAGCGGCCGCATGTCTTACCCAACCTGAA<br>G          | <i>NGT1</i><br>overexpression |
| NGT1-rev        | ACACTACTGCAGATTGTCTATGCTTGTCTGATG               |                               |
| NGT1-UP 5'      | TGTATAGGGCCCAAGCTGTACCAACTAATGG                 | For <i>NGT1</i>               |
| NGT1-UP 3'      | TACTAACTCGAGATGCTGTTGTTGTTGTGATG                | knockout                      |
| NGT1-DOWN<br>5' | ATACTACCGCGGACTGTGTTGTAAGCAAATG                 | plasmid<br>pSFS2A-NGT1K       |
| NGT1-DOWN<br>3' | AACGTAGAGCTCCCATGATCAGTATTCAATG                 | O                             |
| NGT1-L 5'       | GTATTGGTGCATCTATTAGTG                           | Fusion PCR for                |
| NGT1-L 3'       | ACAAGGCAAGCTAAACAGATCTTTAGCAACG<br>ACTCTAGTAC   | <i>NGT1</i> knockout          |
| NGT1-R 5'       | ATCCAGTGTGCGAAAACGAGCTAAATGTTGGG<br>TGCTATTGTC  |                               |
| NGT1-R 3'       | TCGACTTTAGACTTGACAAC                            |                               |
| NGT1 5' check   | ATGTATAGTCGTGTGCGATG                            | <i>NGT1</i> deletion          |
| NGT13' check    | TTCAAGTGCAGCGAATAAAG                            | confirmation<br>(first copy)  |
| NGT1 5' ORF     | TGAGAACTAGATCATTGAATTC                          | <i>NGT1</i> deletion          |
| NGT1 3' ORF     | AAATAAGTGGCACGGCAATC                            | confirmation<br>(second copy) |
| HXK1-fwd        | AGTATTGCGGCCGCATGATTA AAACTACTATT<br>GAAACTGC   | <i>HXK1</i><br>overexpression |
| HXK1-rev        | ATCATAGGTACCTCACTCCAACGTGTTGATTG                |                               |
| HXK1-UP 5'      | TCATATGGGCCCCAGACAGCGATGATGAAGAT<br>G           | For <i>HXK1</i><br>knockout   |
| HXK1-UP 3'      | AGTTATCTCGAGTGGAGTAGCAGTTTCAATAG                | plasmid                       |
| HXK1-DOWN<br>5' | ATCATTCCGCGGTAGTTCAATCATTGGTGCTG                | pSFS2A-HXK1K<br>O             |
| HXK1-DOWN<br>3' | ACATATGAGCTCTGACAAGTTCTTTAACCACG                |                               |
| HXK1-L 5'       | TGATGGAAGTTAATGATGTC                            | Fusion PCR for                |
| HXK1-L 3'       | ACAAGGCAAGCTAAACAGATCTGTA ACTAGT<br>GGTTTCCAATG | <i>HXK1</i> knockout          |
| HXK1-R 5'       | ATCCAGTGTGCGAAAACGAGCTTGACGATCAC<br>ATGAAGTTG   |                               |
| HXK1-R 3'       | ACATAACCAATTGTAACGTC                            |                               |
| HXK1 5' check   | TTAACCAATTGCCAAGTTGAG                           | <i>HXK1</i> deletion          |
| HXK13' check    | GTTGGCTCCATCTGATTTAC                            | confirmation<br>(first copy)  |
| HXK1 5' ORF     | ATGATCATGGATGTGCGTTC                            | <i>HXK1</i> deletion          |

|                 |                                                |                               |
|-----------------|------------------------------------------------|-------------------------------|
| HXK1 3' ORF     | TCATAATCGTCAGTCTCGTG                           | confirmation<br>(second copy) |
| DAC1-fwd        | AGTATAGCGGCCGCATGTCTTATACTAGATTC<br>ACTAATTGC  | <i>DAC1</i><br>overexpression |
| DAC1-rev        | TTCAGACTGCAGAGCCAATAACTACATTGTCCG              |                               |
| DAC1-UP 5'      | TAGTATGGGCCCTCTACTGTTGGCTTTAATAG               | For <i>DAC1</i>               |
| DAC1-UP 3'      | AGTTATCTCGAGATGGATCATTAGGTCATCTG               | knockout                      |
| DAC1-DOWN<br>5' | ATCATTCCGCGGTGTGCAAAAAGTCTACAAG<br>C           | plasmid<br>pSFS2A-DAC1K       |
| DAC1-DOWN<br>3' | ATTACAACAAGAGAGCTCAG                           | O                             |
| DAC1-L 5'       | TATAAACTCCACCATGTGTC                           | Fusion PCR for                |
| DAC1-L 3'       | ACAAGGCAAGCTAAACAGATCTAGTCACAGT<br>AGGACAAGTAG | <i>DAC1</i> knockout          |
| DAC1-R 5'       | ATCCAGTGTGCGAAAACGAGCTTGTACAATGC<br>CATGCCAC   |                               |
| DAC1-R 3'       | TAGCCTTGTTTGTCCAATAC                           |                               |
| DAC1 5' check   | AGCATGTCTTGGAACTTTAG                           | <i>DAC1</i> deletion          |
| DAC13' check    | ATCATTAGCCGCTCCATTG                            | confirmation<br>(first copy)  |
| DAC1 5' ORF     | CGAATTTCCCAGAGGTTTAC                           | <i>DAC1</i> deletion          |
| DAC1 3' ORF     | TTCAATAGCTTGAACACCTG                           | confirmation<br>(second copy) |
| NAG1-fwd        | AGTTAAGCGGCCGCATGAGACAAGCTACTTTT<br>TCCAG      | <i>NAG1</i><br>overexpression |
| NAG1-rev        | TTCAGACTGCAGTAGTTCAATCATTGGTGCTG               |                               |
| NAG1-UP 5'      | TAGTATGGGCCCAGAATCTCCTAAACTCAGTG               | For <i>NAG1</i>               |
| NAG1-UP 3'      | AGTTATCTCGAGTGTATAGCTAAAGTGTCATG<br>G          | knockout<br>plasmid           |
| NAG1-DOWN<br>5' | ATCATACCGCGGTACTGGTGTACTCACATTG                | pSFS2A-NAG1K                  |
| NAG1-DOWN<br>3' | AACGTAGAGCTCTGTTGATGCTAGATTCAAAC               | O                             |
| NAG1-L 5'       | TCCGAATTGTAATGATGATG                           | Fusion PCR for                |
| NAG1-L 3'       | ACAAGGCAAGCTAAACAGATCTAGTGGCCAA<br>TCCATTCAAG  | <i>NAG1</i> knockout          |
| NAG1-R 5'       | ATCCAGTGTGCGAAAACGAGCTTTATTTTGGG<br>TGGCTTGG   |                               |
| NAG1-R 3'       | CTCATAGTCTACTTTGTCTTG                          |                               |
| NAG1 5' check   | CAAGTATTTTGTGTCATGGCAT                         | <i>NAG1</i> deletion          |
| NAG1 3' check   | ATTTGCCACCAAGTATGATG                           | confirmation<br>(first copy)  |
| NAG1 5' ORF     | TGTGCTGAATATGAAGCTAAG                          | <i>NAG1</i> deletion          |
| NAG1 3' ORF     | TTTAGATTTCAAGCCAGCAG                           | confirmation                  |

|              |                       |                |
|--------------|-----------------------|----------------|
| <u>Hph-F</u> | AGATCTGTTTAGCTTGCCTTG | (second copy)  |
| <u>Hph-R</u> | AGCTCGTTTTTCGACACTGG  | Amplification  |
|              |                       | cahph marker   |
|              |                       | for fusion PCR |
|              |                       | For q-RT-PCR   |
| NGT-F        | TTGGACTTTGGAGAACTTTG  |                |
| NGT1-R       | ACATTTGAGCTAACCAGTAC  |                |
| HXK1-F       | AACCACTAGTTACAACAGTG  |                |
| HXK1-R       | ACATCCATGATCATTCCATG  |                |
| DAC1-F       | TTCTACAAAGATGCCATGAC  |                |
| DAC1-R       | AGTCTGGCCATCCAATCTAG  |                |
| NAG1-F       | TTGGCTCCATCTGATTTAC   |                |
| NAG1-R       | TCTTAGCTTCATATTCAGCAC |                |
| ACT1-F       | TTGTACTCTTCTGGTAGAAC  |                |
| ACT1-R       | AAGTGTAACCACG TTCAGAC |                |

---
